# Supplementary material
Source: publisher figshare collection journal article supplement (https://sage.figshare.com/ndownloader/files/15253682)
Supplement: Supplementary file 1 [file 15253682]

## Supplementary Material

Table 1.

*Means and Standard Deviations for Neutral, Obese, and Muscular Trials in Milliseconds.*

| Trial Conditions | Mean ( <i>ms</i> ) | <i>SD</i> ( <i>ms</i> ) |
|------------------|--------------------|-------------------------|
| Neutral          | 2558.80            | 110.21                  |
| Obese            |                    |                         |
| Congruent        | 2387.09            | 125.45                  |
| Incongruent      | 2562.68            | 91.38                   |
| Muscular         |                    |                         |
| Congruent        | 2281.34            | 90.42                   |
| Incongruent      | 2575.47            | 83.97                   |

Table 2.

*Means and Standard Deviations for Attentional Bias and Attentional Disengagement Scores*

*Milliseconds.*

|                           | Mean ( <i>ms</i> ) | <i>SD</i> ( <i>ms</i> ) |
|---------------------------|--------------------|-------------------------|
| Obese                     |                    |                         |
| Attentional Bias          | 171.71             | 202.55                  |
| Attentional Disengagement | -3.87              | 164.23                  |
| Muscular                  |                    |                         |
| Attentional Bias          | 277.45             | 208.58                  |
| Attentional Disengagement | -16.67             | 160.15                  |
